# Supplementary material for: Theoretical investigation of a tetrazine based covalent organic framework as a promising anode material for sodium/calcium ion batteries
Source: Royal Society of Chemistry journal article supplement (doi:10.1039/d2cp02852b), 2022-01-01
Supplement: d2cp02852b4.pdf [file d2cp02852b4.pdf]

# Theoretical Investigation of a Tetrazine Based Covalent Organic Framework as a Promising Anode Material for Sodium/Calcium Ion Batteries

Priya Das, Biswajit Ball, and Pranab Sarkar\*

*Department of Chemistry, Visva-Bharati University, Santiniketan- 731235, India*

E-mail: pranab.sarkar@visva-bharati.ac.in

## Supporting Information

S1. Electron localization function (ELF) plots of bilayer TZA at (a) (100) and (b) (010) cutoff planes, respectively .

S2. Electronic band structure plot of bilayer TZACOF using HSE06 functional.

S3. Top views of the bilayer TZACOF after the adsorption of (a) sodium and (b) calcium atom.

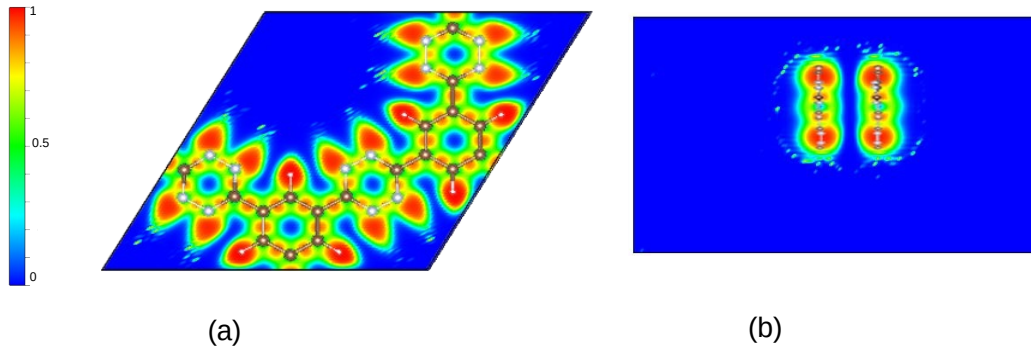

Figure 1: Electron localization function (ELF) plots of bilayer TZACOF at (a) (100) and (b) (010) cutoff planes, respectively

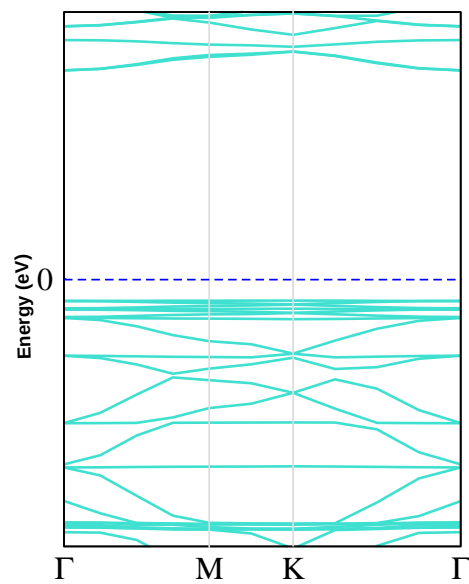

Figure 2: Electronic band structure plot of bilayer TZACOF using HSE06 functional

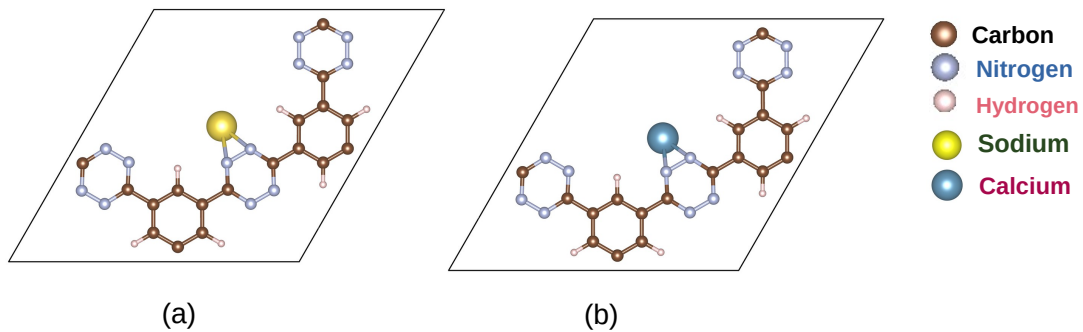

Figure 3: Top views of the bilayer TZACOF after the adsorption of (a) sodium and (b) calcium atom.
