# Supplementary figures and images for: Theoretical investigation of a tetrazine based covalent organic framework as a promising anode material for sodium/calcium ion batteries
Source: Royal Society of Chemistry journal article supplement (doi:10.1039/d2cp02852b), 2022-01-01

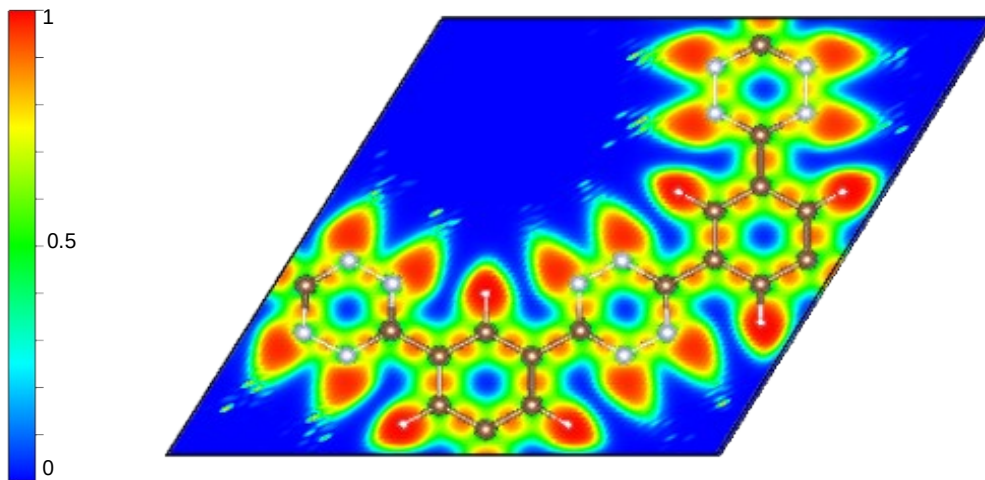

(a)

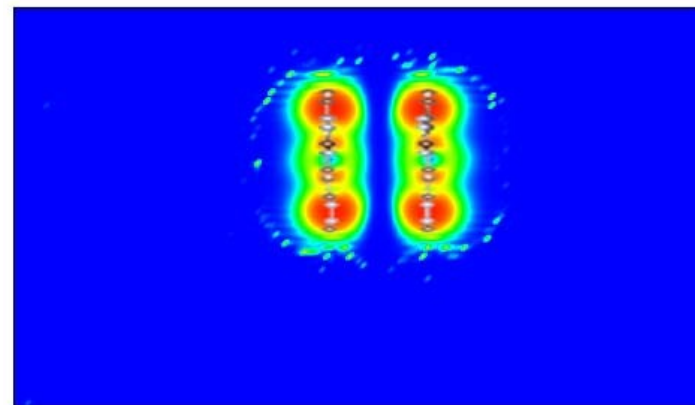

(b)

Supplement: d2cp02852b1.pdf [file d2cp02852b1.pdf]

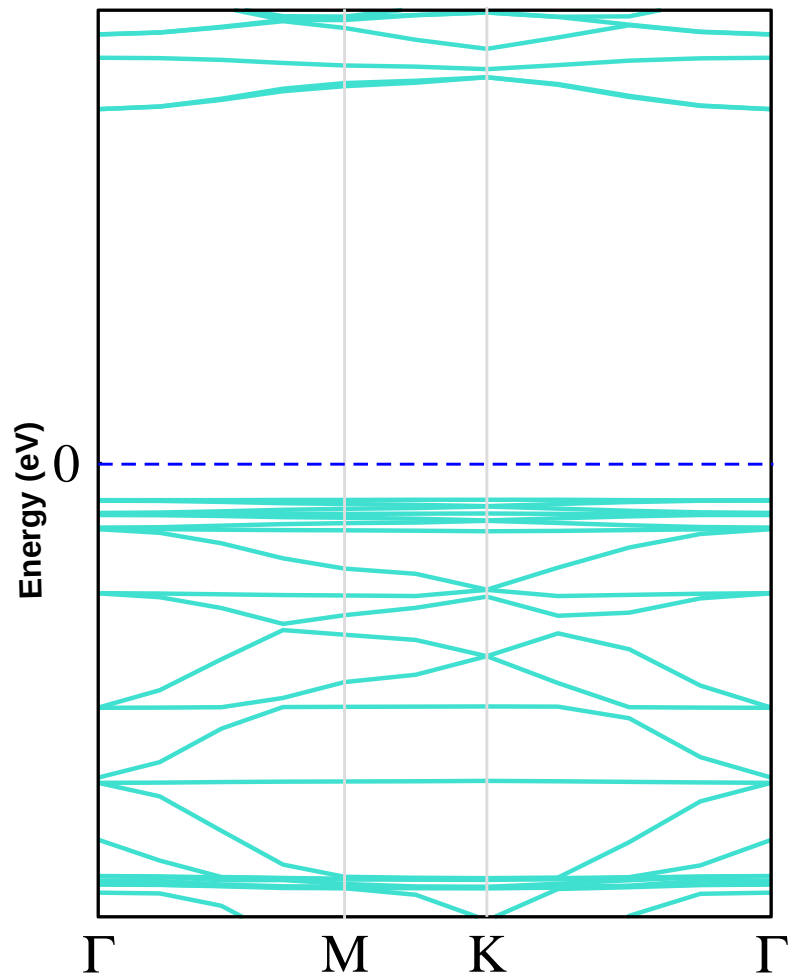

Supplement: d2cp02852b2.pdf [file d2cp02852b2.pdf]

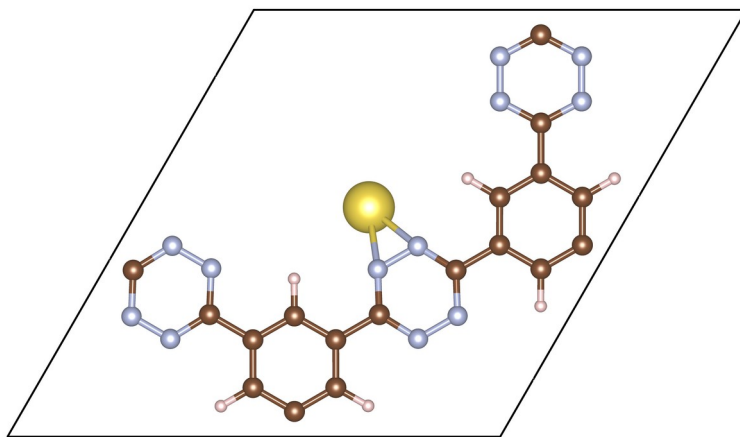

(a)

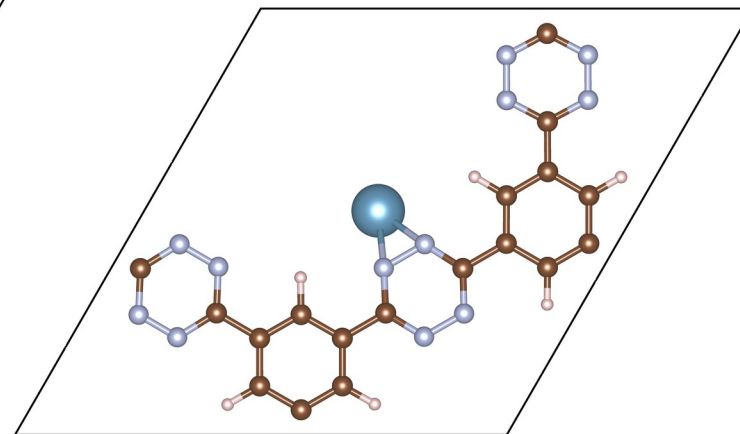

(b)

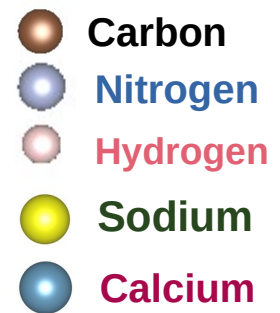

Supplement: d2cp02852b3.pdf [file d2cp02852b3.pdf]
